# Supplementary material for: Construction and evaluation of a predictive model for catheter dysfunction in cancer patients with implanted vascular access ports: A cross-sectional study
Source: Research Square preprint supplement (doi:10.21203/rs.3.rs-7427340/v1), 2025-09-29
Supplement: Supplementary file 1 [file fa3257c548a8d9bcb0fd38bc.docx]

**General Information Questionnaire**

**Instruction:** Please select the appropriate option by marking a "✓" next to the corresponding number, or fill in the required information in the blank "____" according to the patient’s actual situation.

**Demographic characteristics**

1. Date of Admission：________________
2. Medical Record Number：__________________
3. Name：____________________
4. Gender：Male Female
5. Age(year)：_________
6. Height：_________cm Weight：_________kg BMI：_________
7. Degree of education：Primary school or below Junior high school Senior high school Junior college Bachelor or above
8. Place of residence：Village Town
9. Occupation：Retirement On-post staff Freelancer Farmer Unemployed Others_________
10. Marital status: Unmarried Married Lose marriage
11. Medical insurance type：Medical insurance for workers Medical insurance for residents No medical insurance

**Disease-related characteristics**

1. Diagnose：________________
2. Completed chemotherapy：Yes No
3. The chemotherapy regimen included a home-chemotherapy-pump：Yes No
4. Other underlying diseases：Yes, _________ No
5. Infectious disease：Yes, _________ No
6. Smoke or not：Yes No

**CVAD-related information**

1. Time with port(month)：___________________
2. Implanting position：Chest port Upper arm port
3. Implanting limb：Right Left
4. Location of port tip ：Upper or mid of superior vena cava Lower of superior vena cava or right atrium Not in superior vena cava
5. Maintain port schedule：Yes No
6. Implanted CVAD before：Yes No
7. Occurred catheter dysfunction before：Yes No
